# Supplementary material for: Physiological Response of Miscanthus x giganteus to Plant Growth Regulators in Nutritionally Poor Soil
Source: MDPI journal article supplement (doi:10.3390/plants9020194), 2020-02-05

**Figure S2.** Boxplots of fluorescence indexes

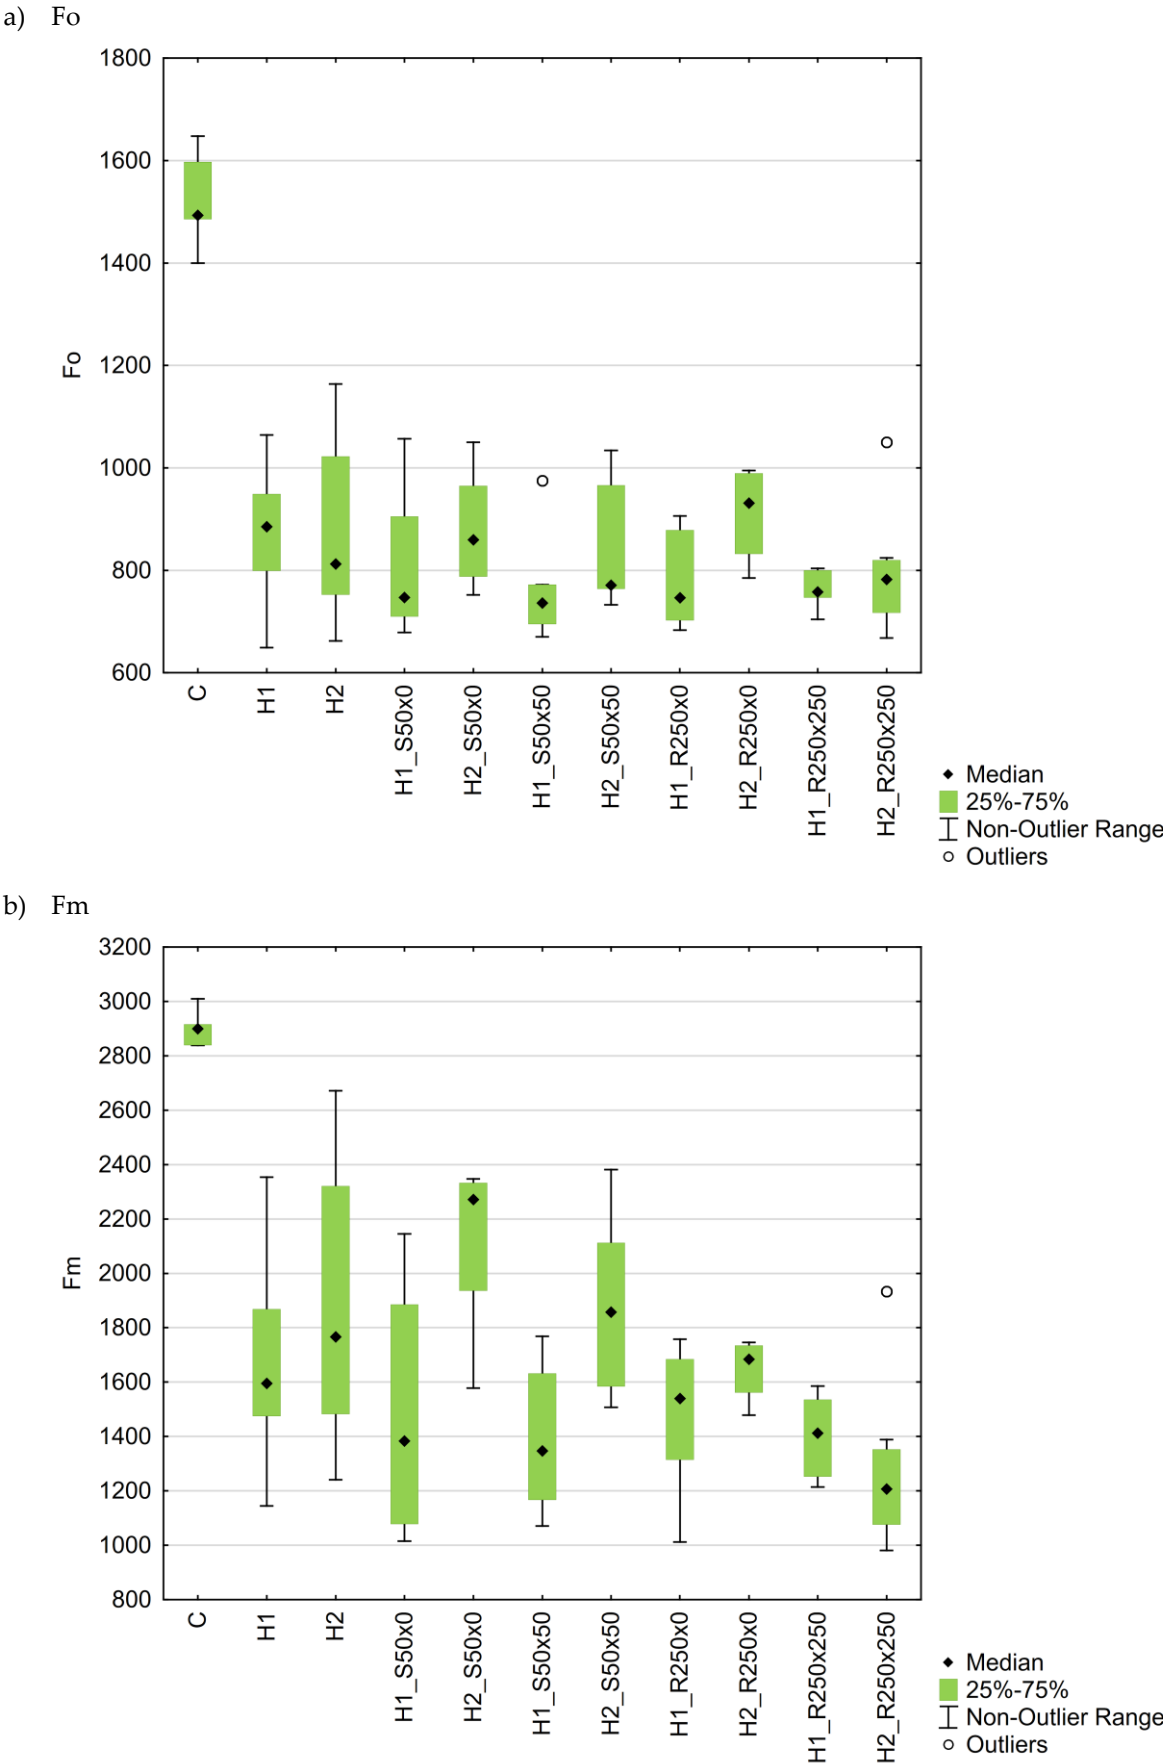

c) Fv

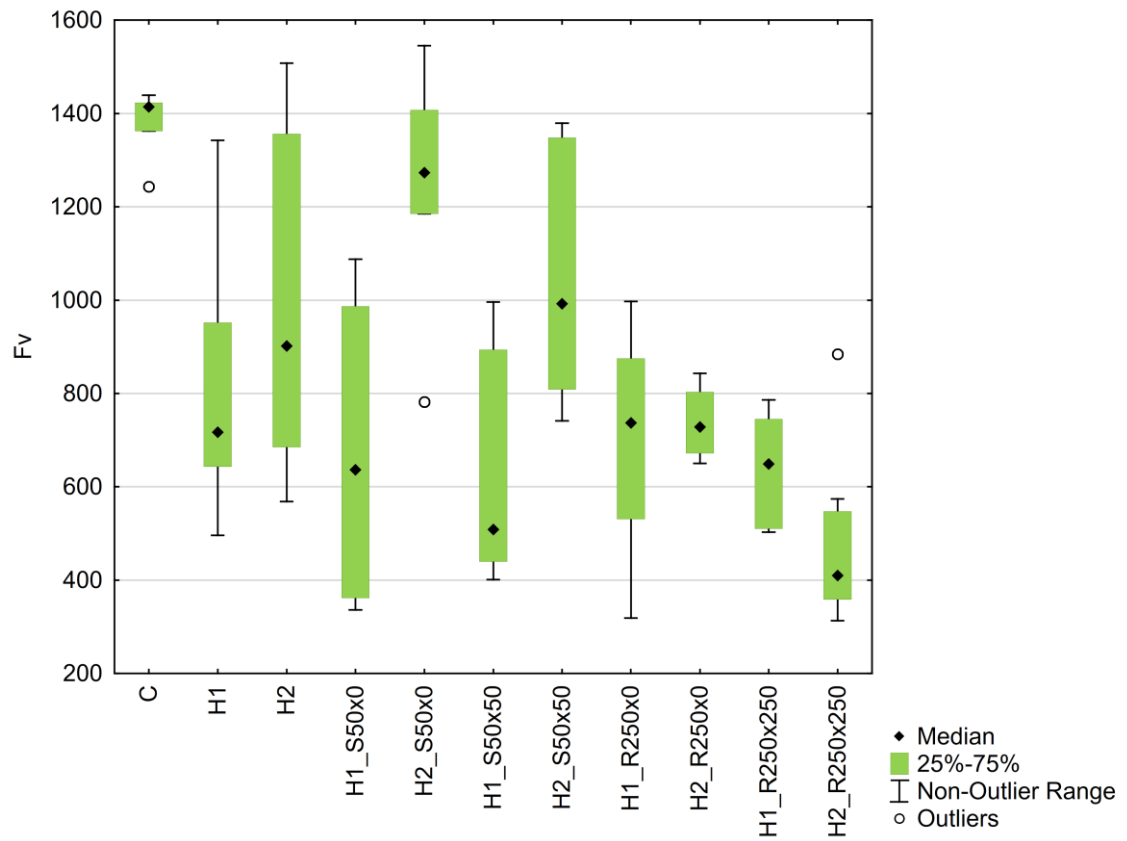

d) Fv/Fo

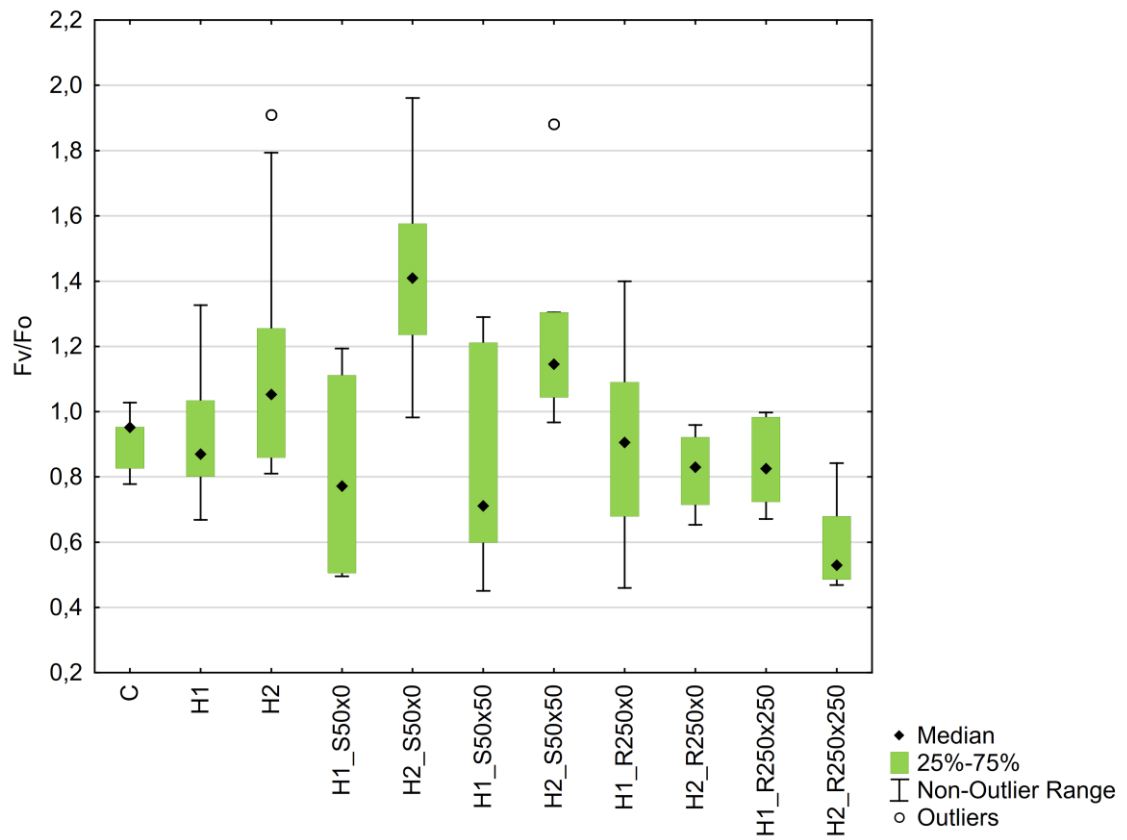

e)  $V_j$

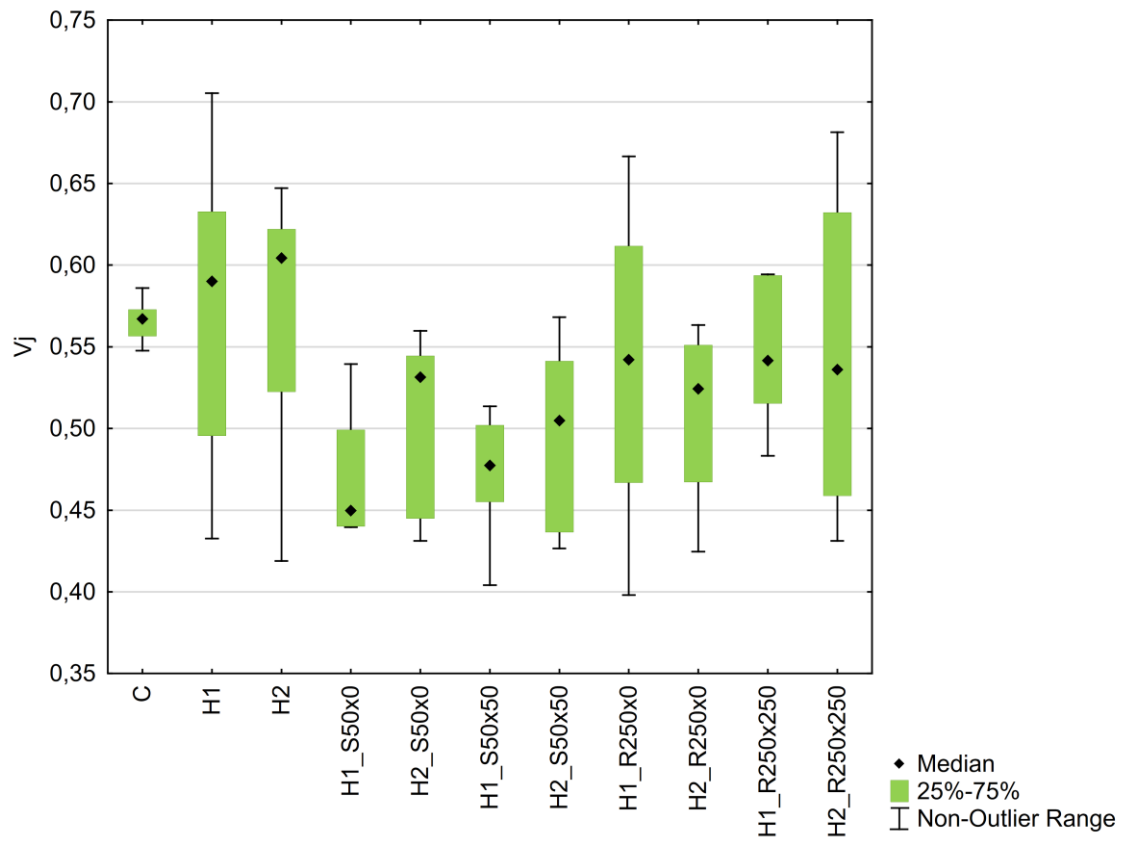

f)  $V_i$

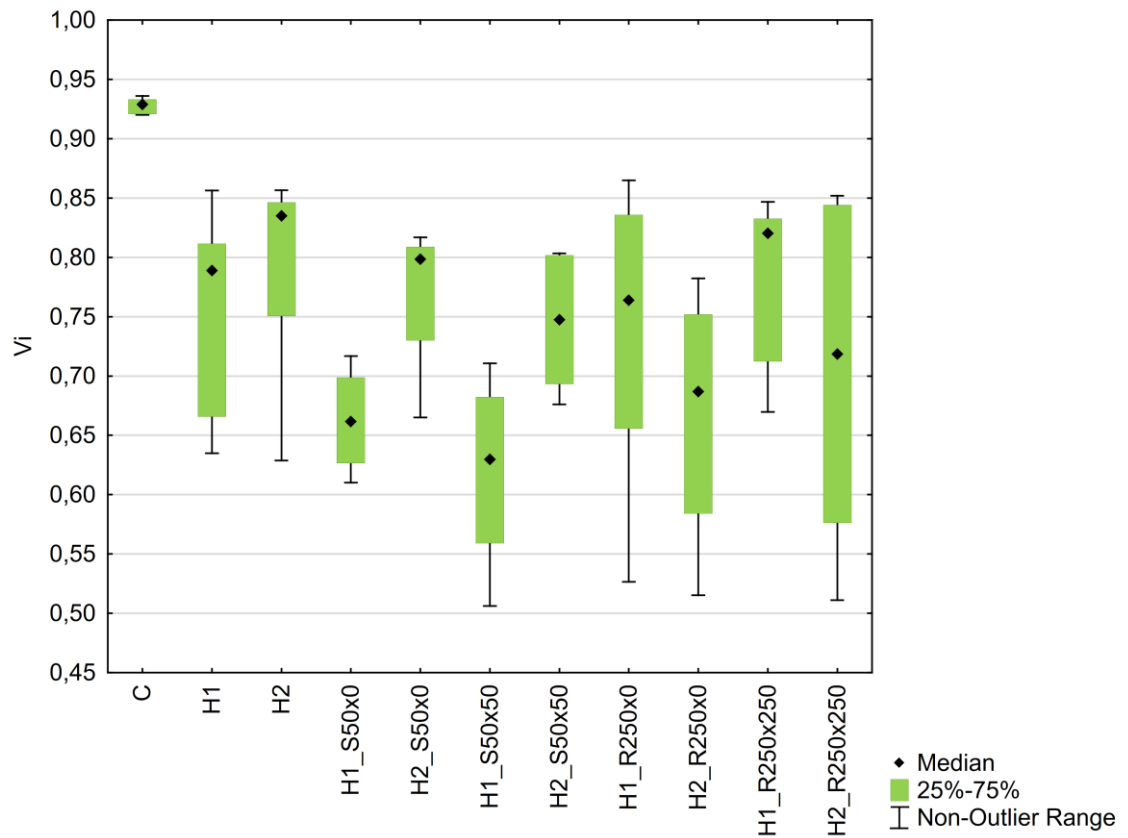

g) ABS/CSm

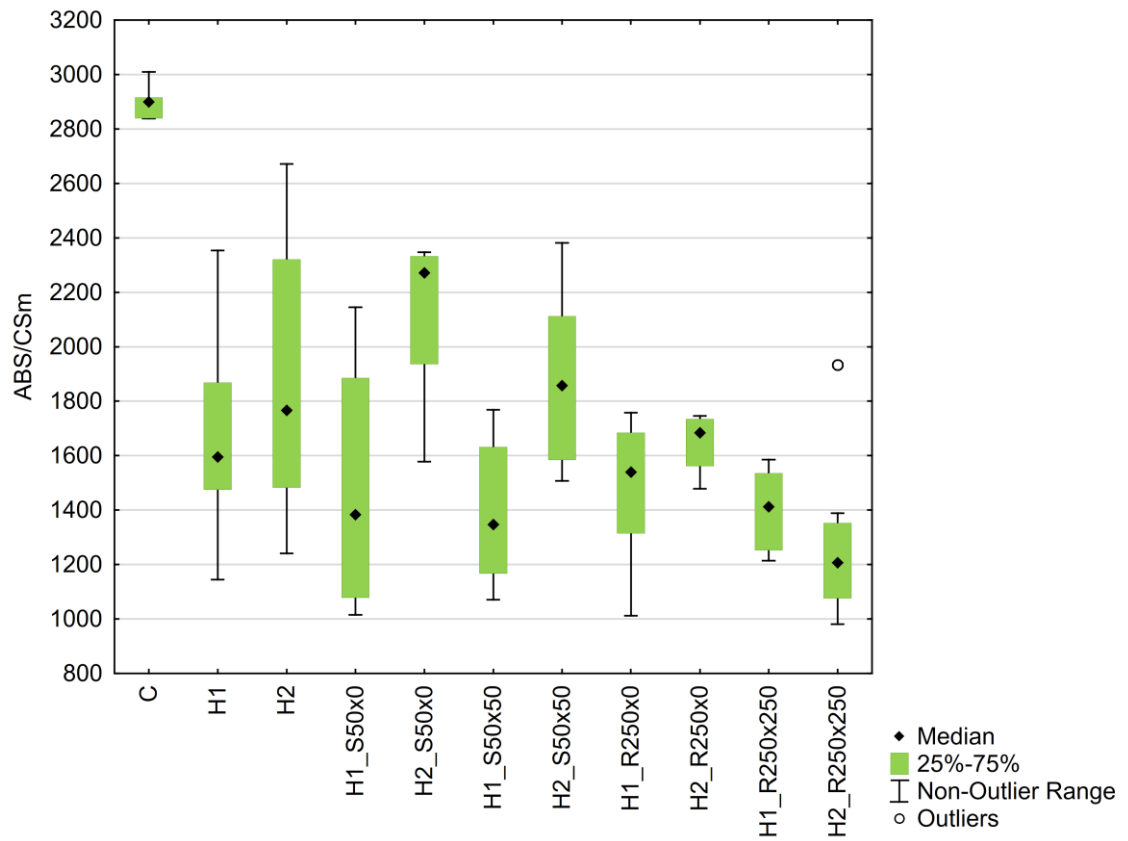

h) TRo/RC

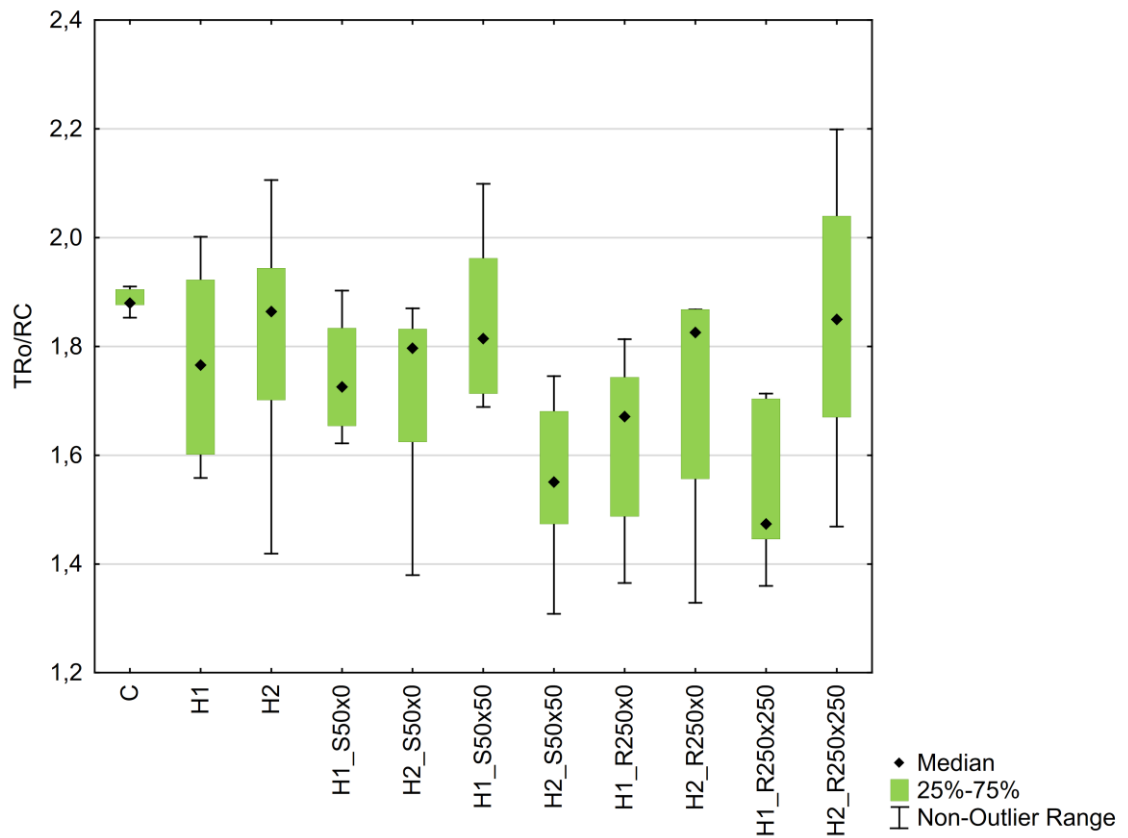

i) D<sub>Io</sub>/RC

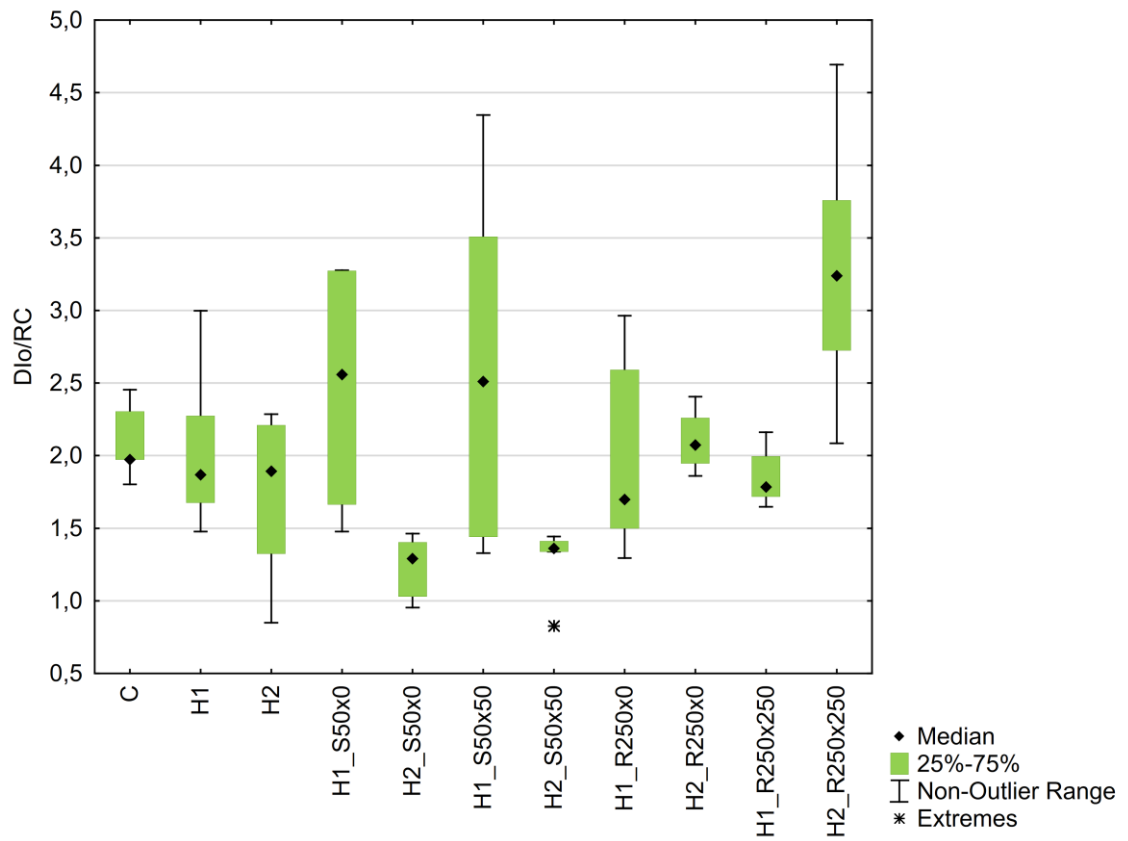

j) ABS/CS<sub>o</sub>

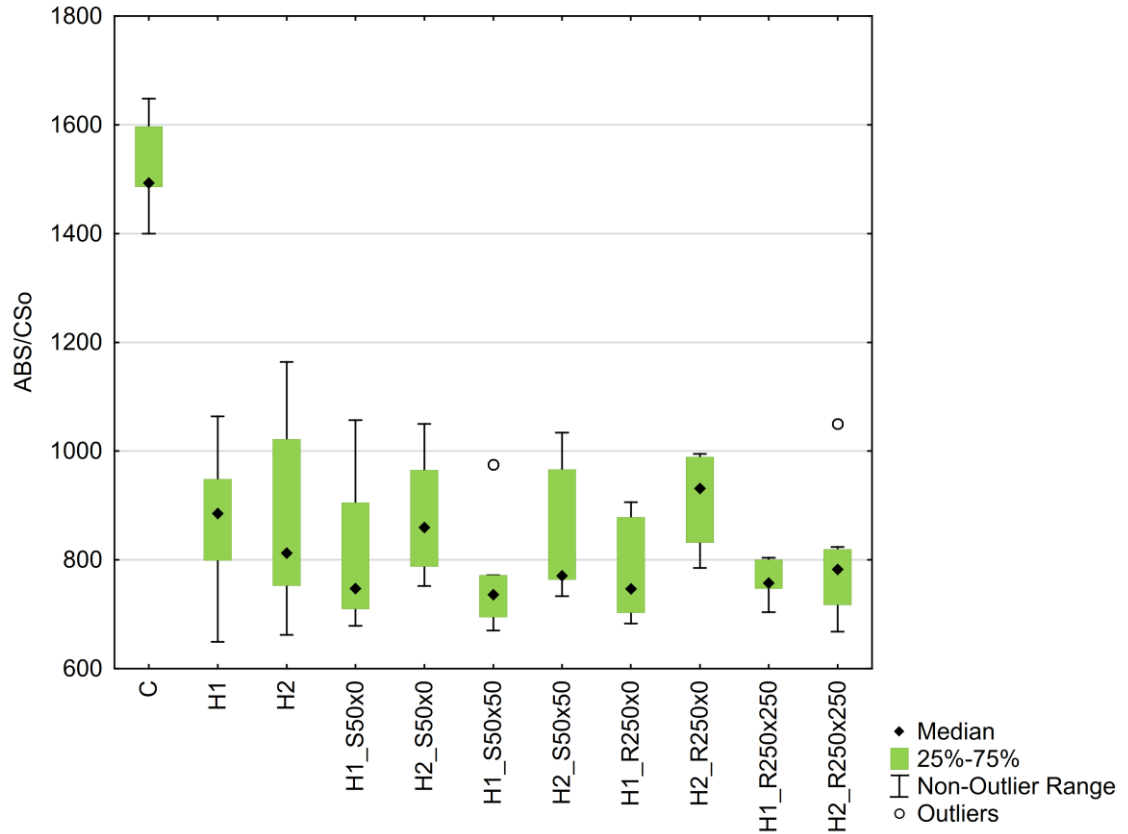

k) ET<sub>o</sub>/RC

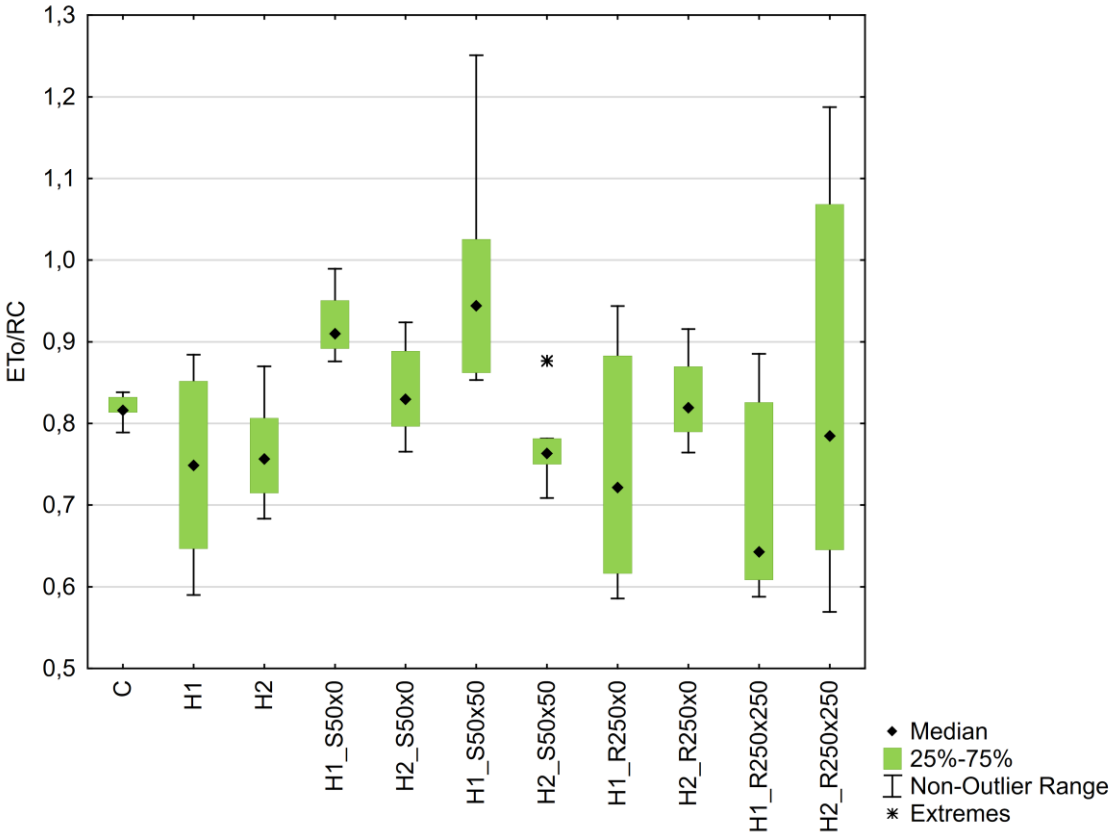

l) DI<sub>o</sub>/CS<sub>m</sub>

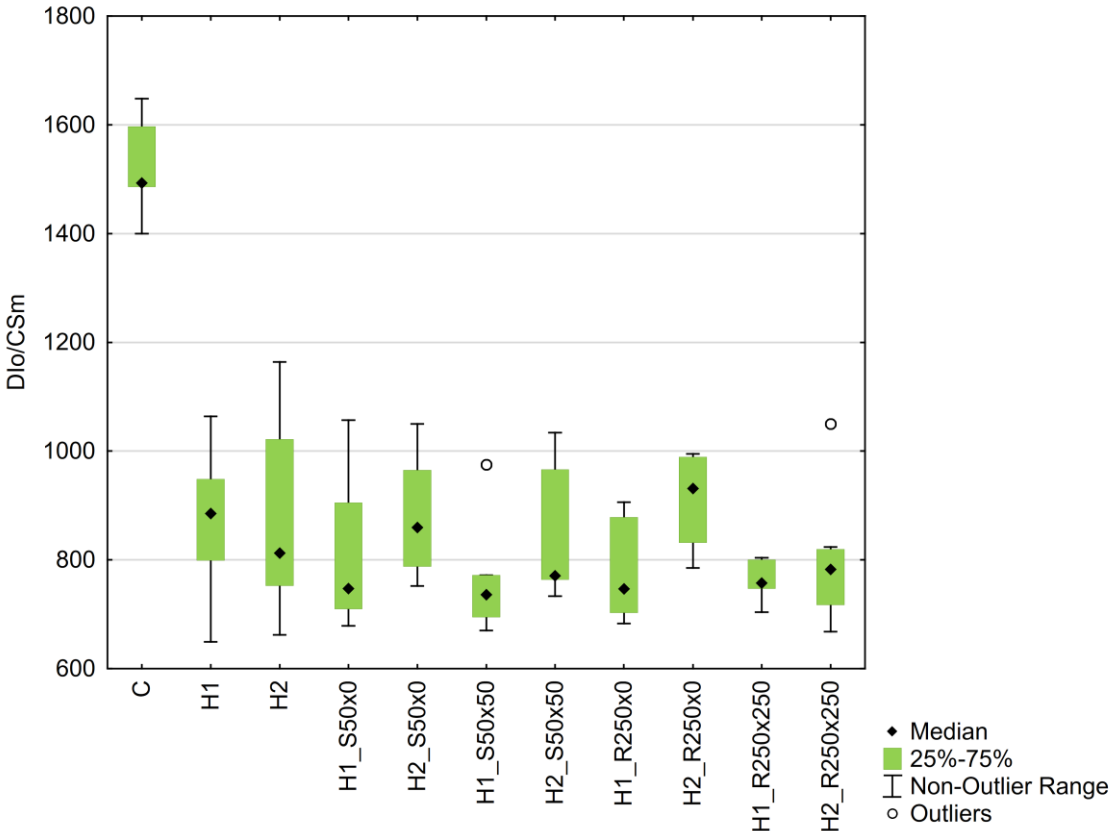

m) TRo/CSm

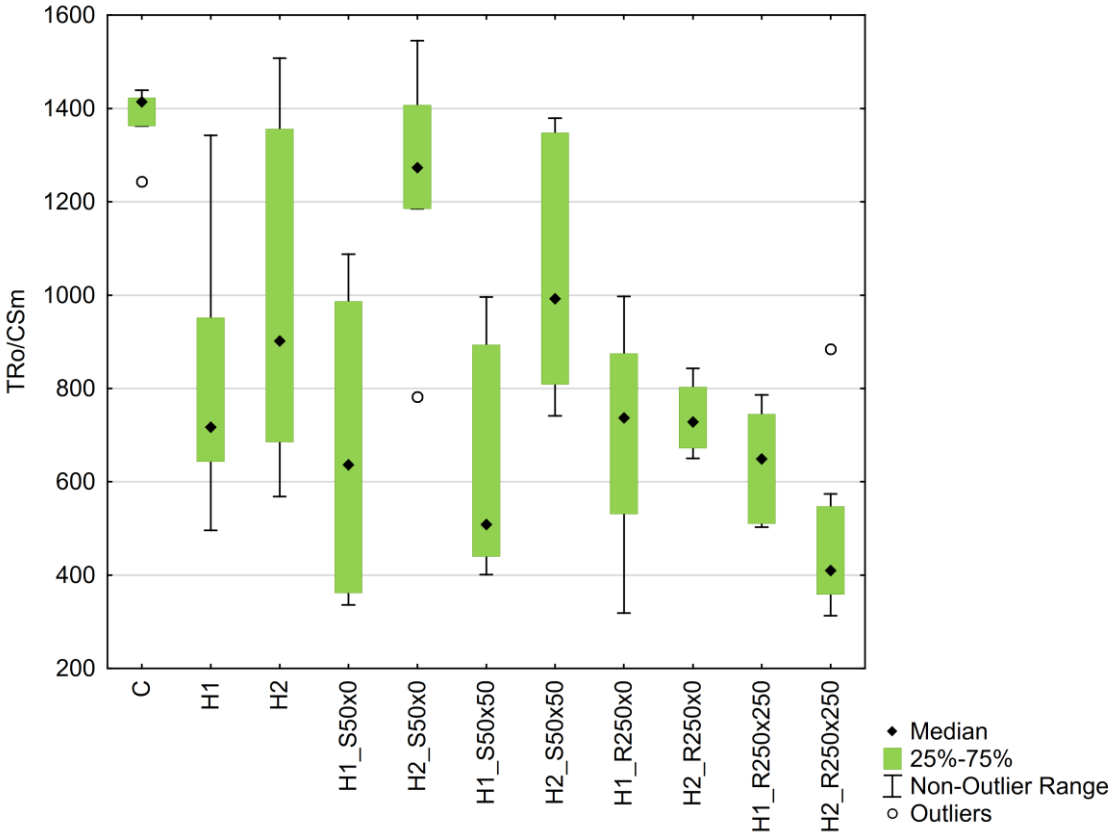

n) Tfm

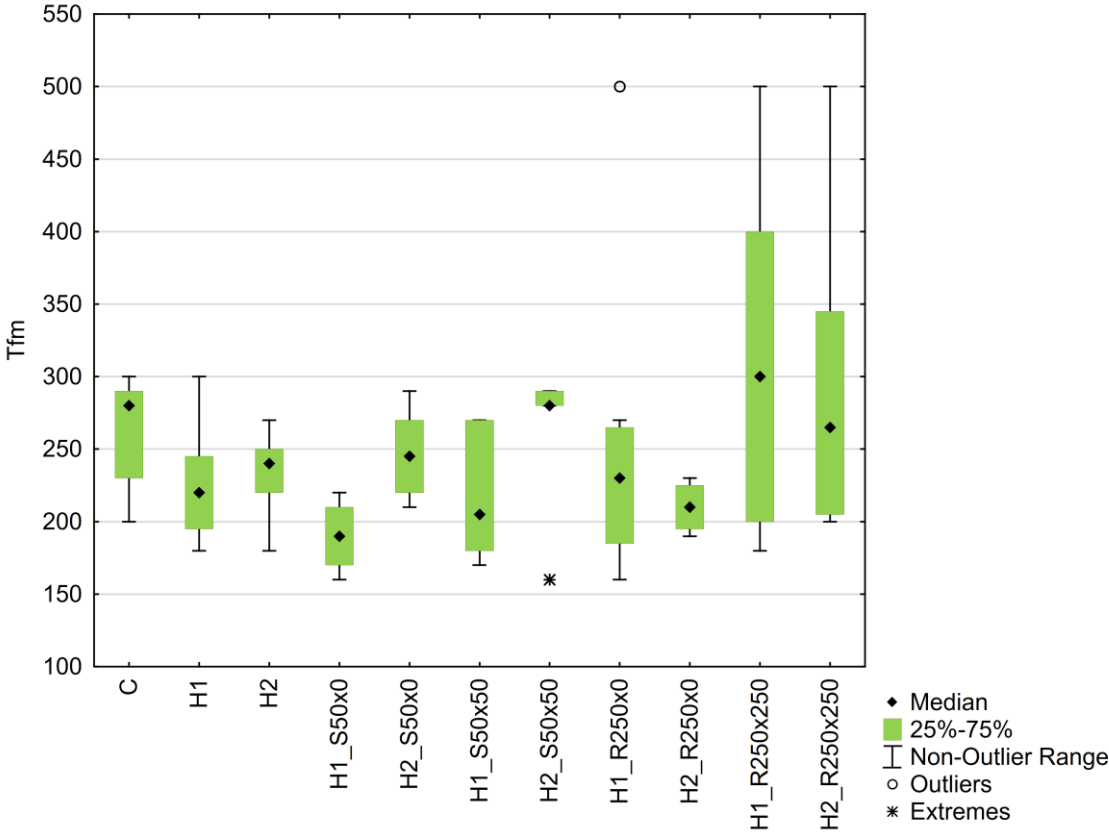

o)  $ETo/CSm$

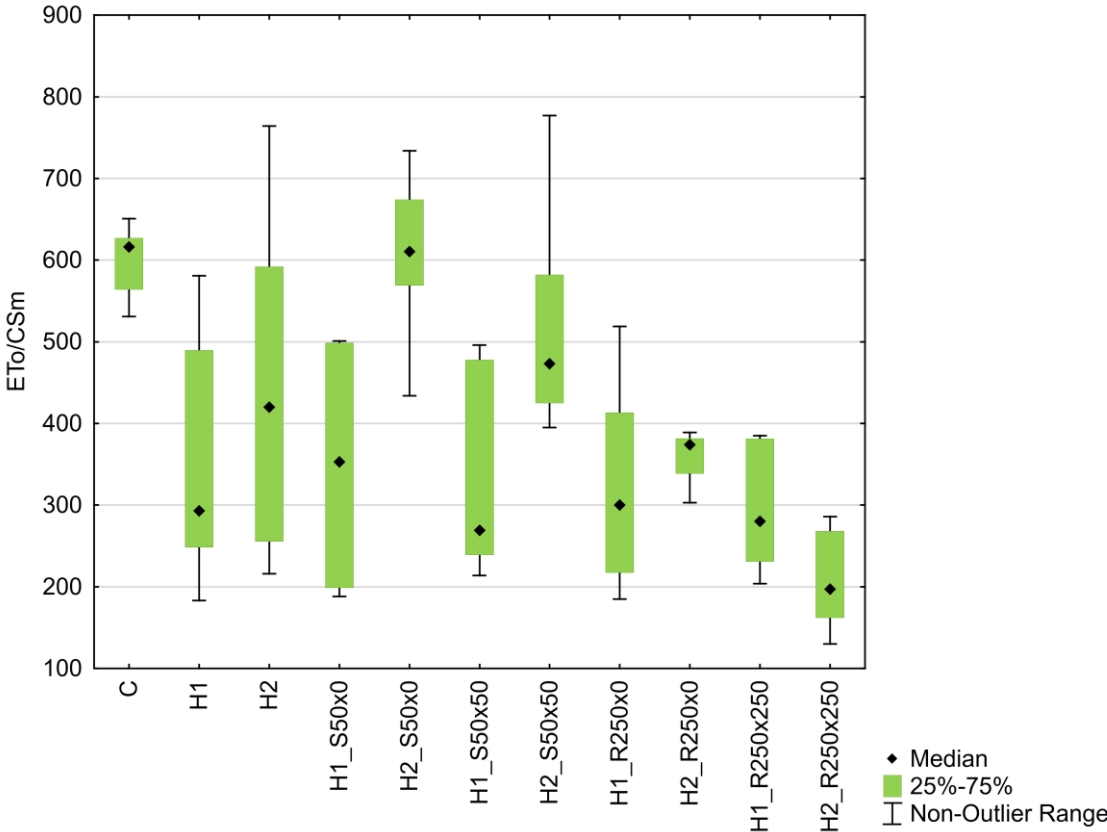

p)  $Fo/Fm$

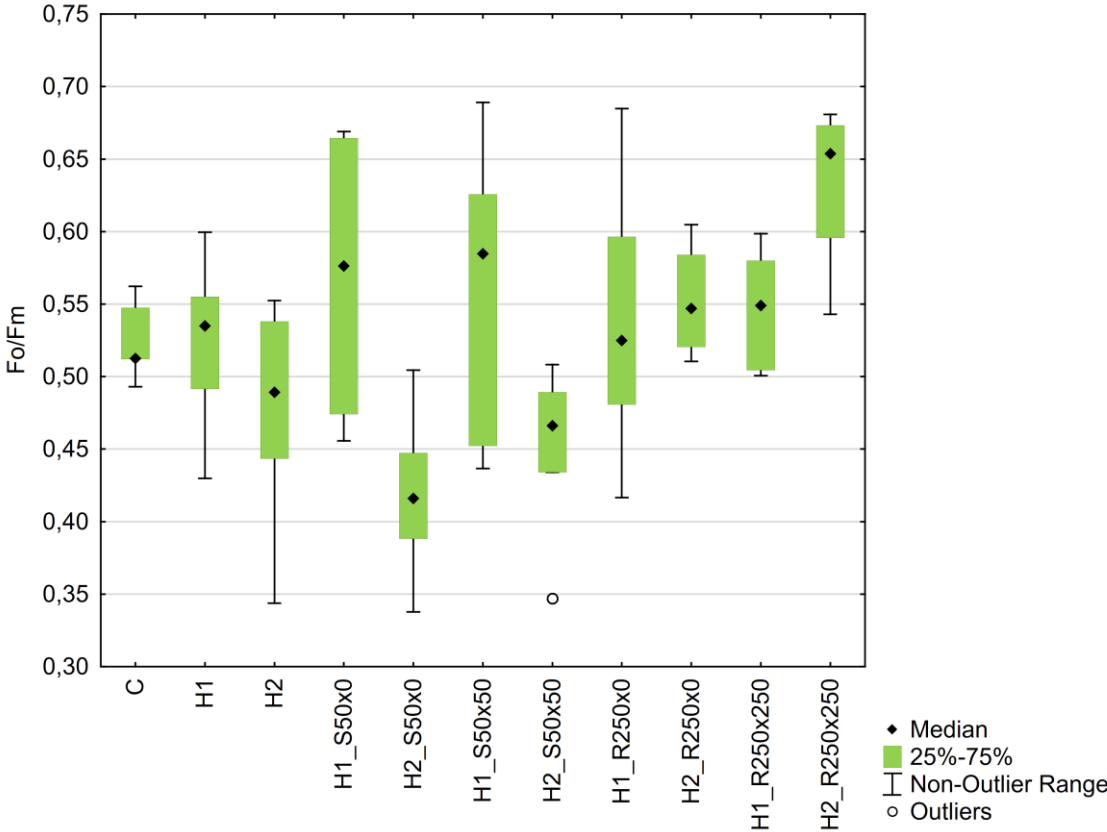



q) Fv/Fm

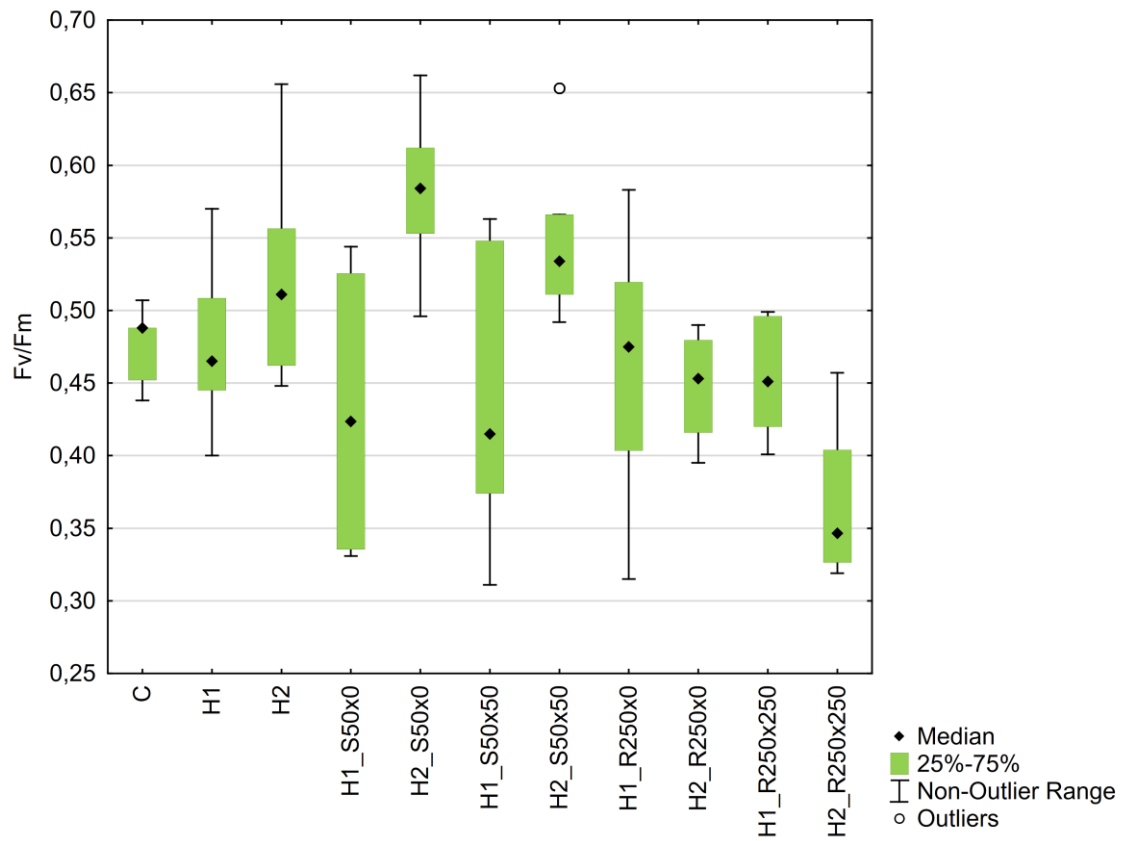

r) Dlo/CSO

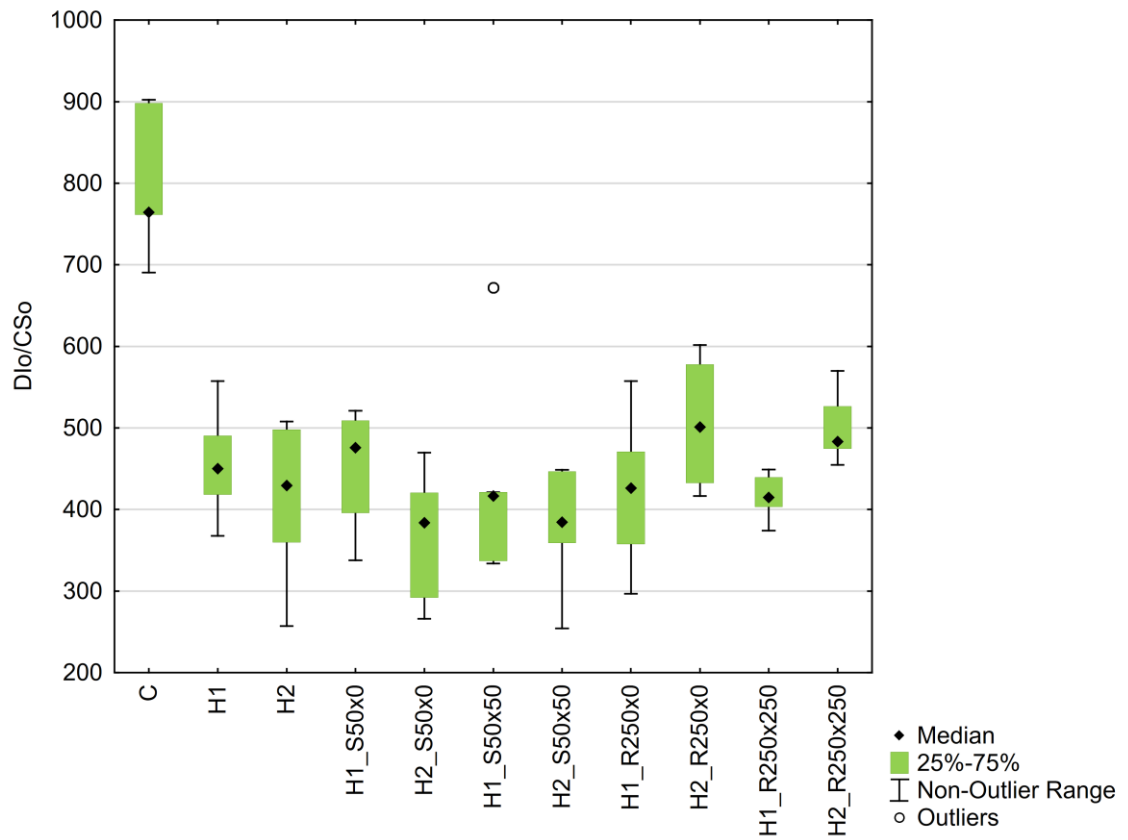

s) TRo/CSo

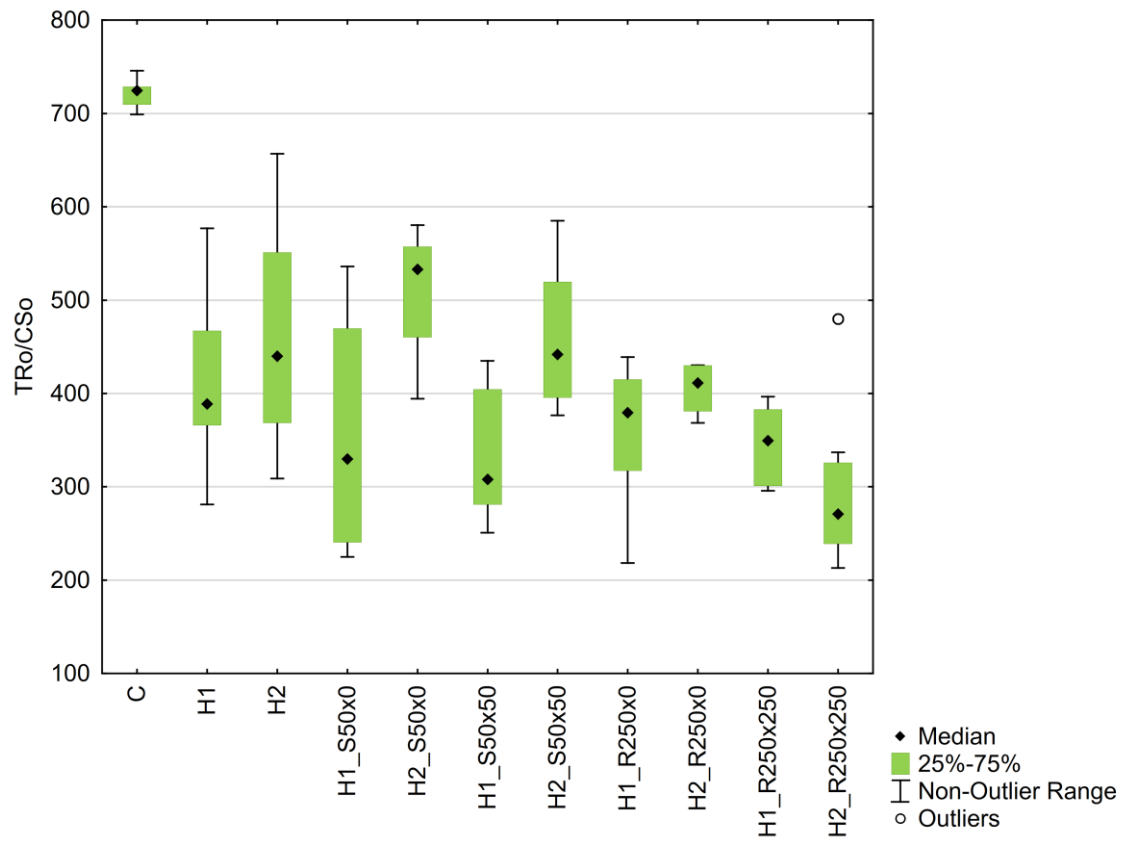

t) ETto/CSo

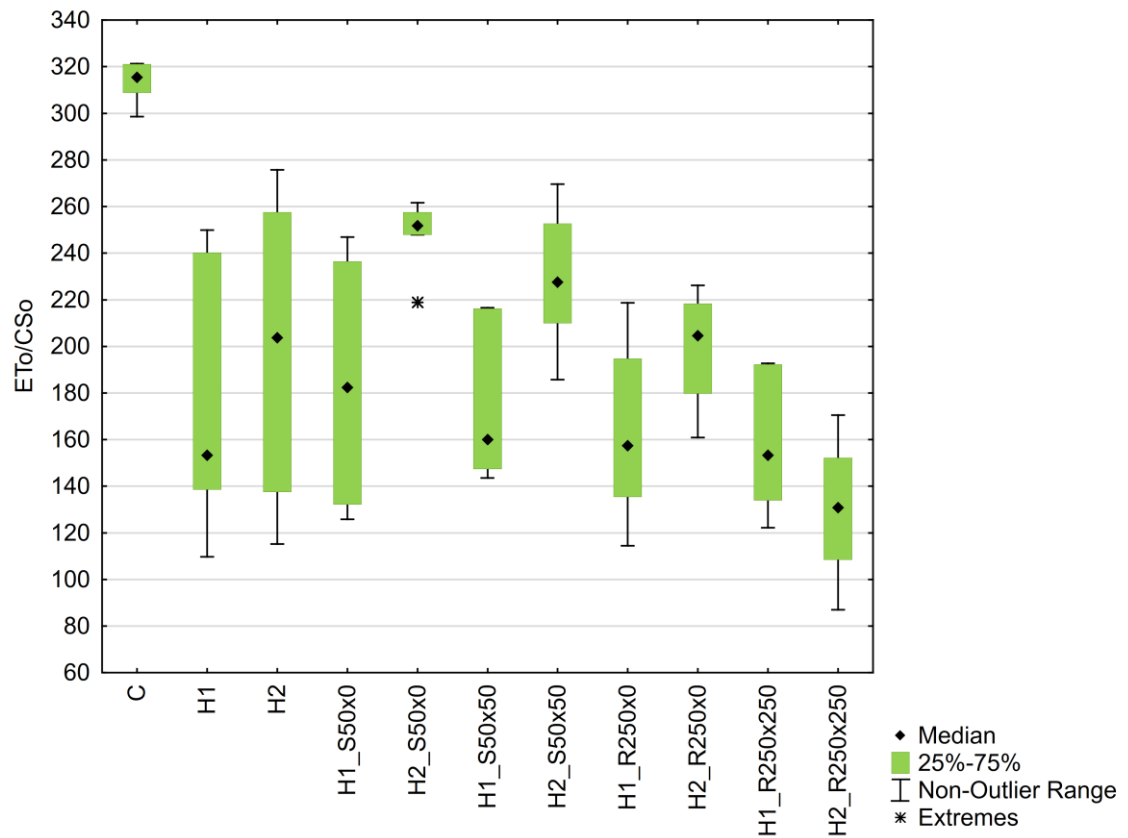

u) REo/CSo

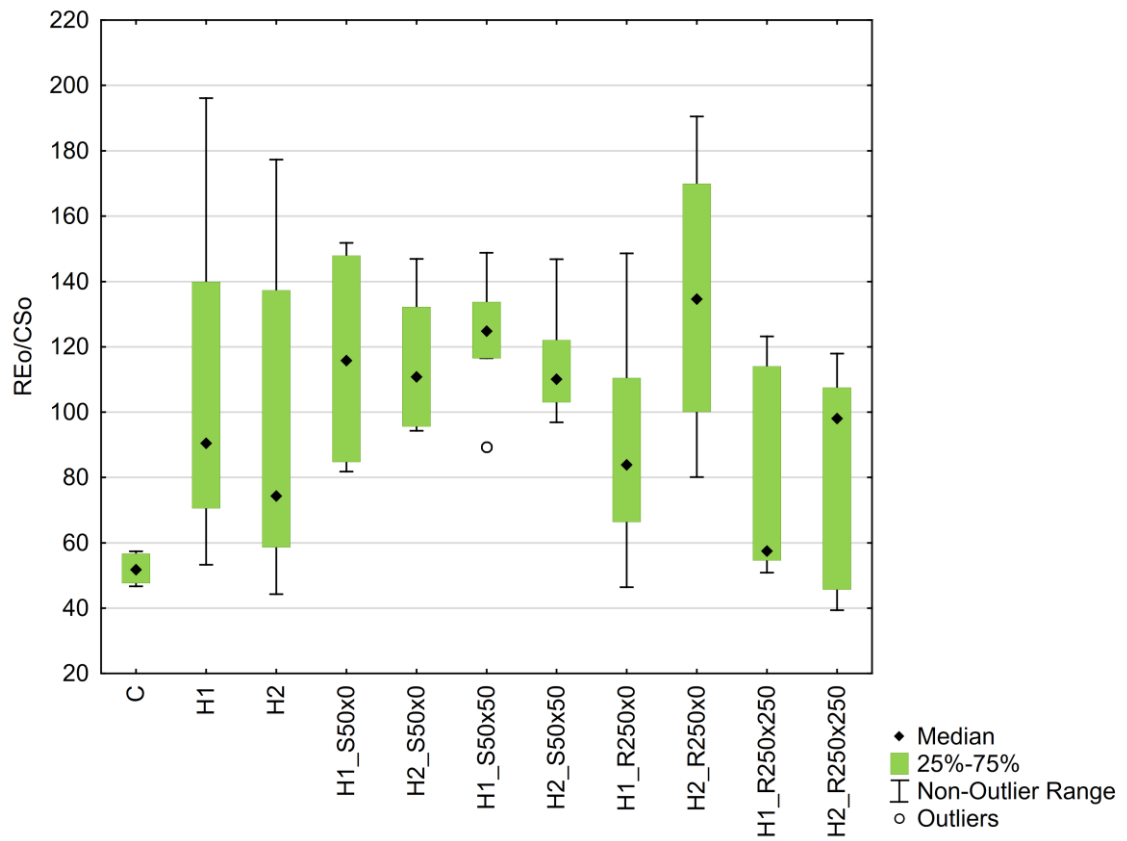

v) REo/CSm

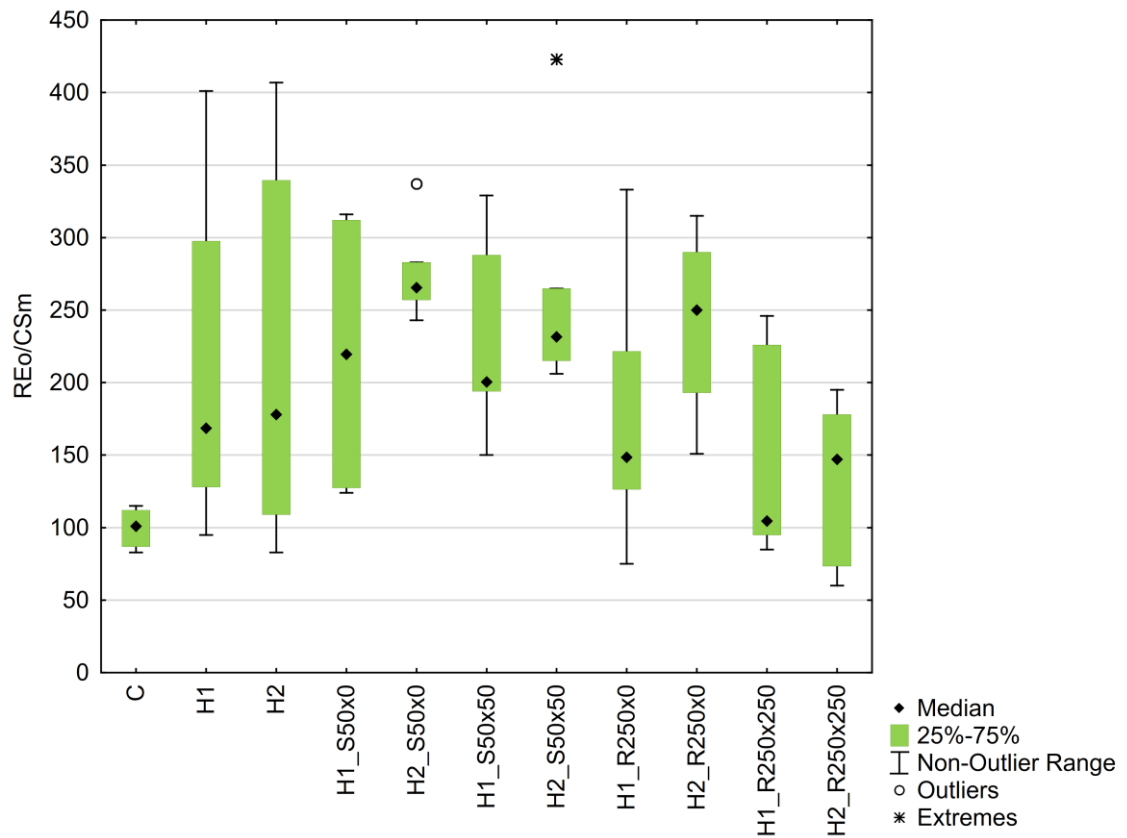

w) PI abs

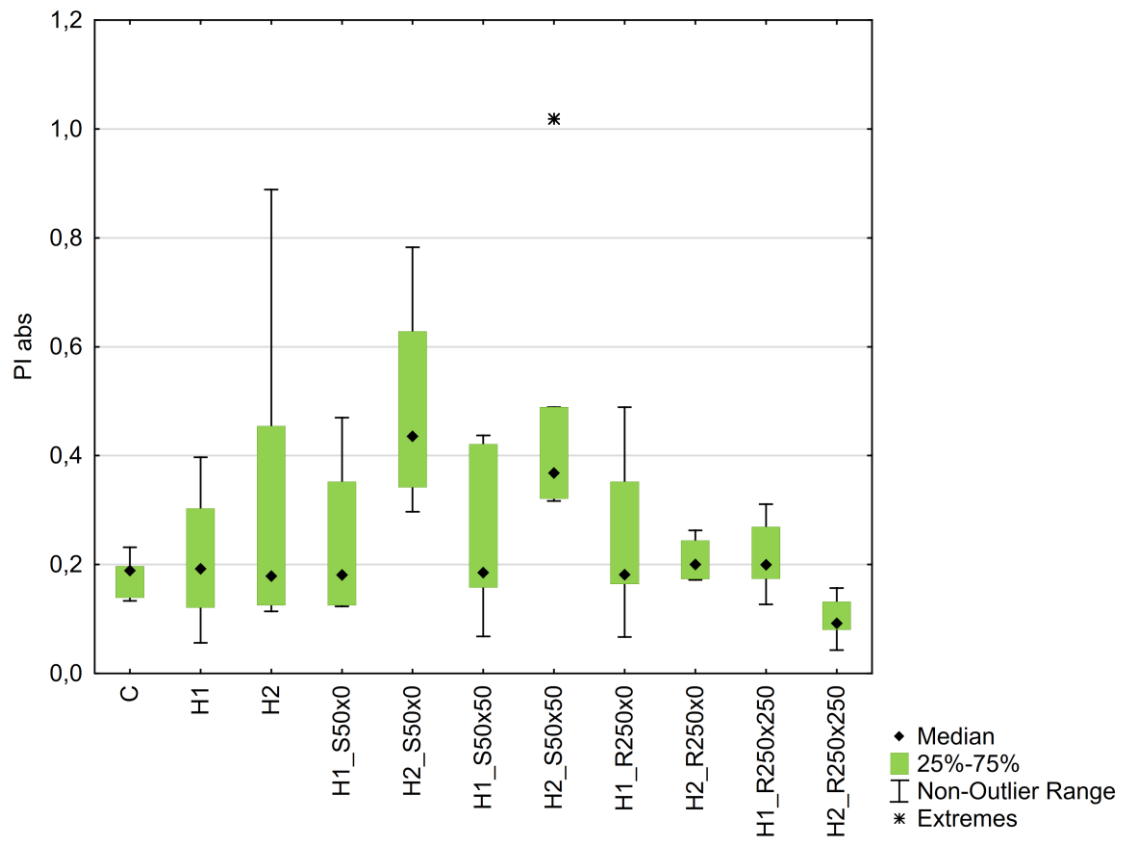

x) REo/RC

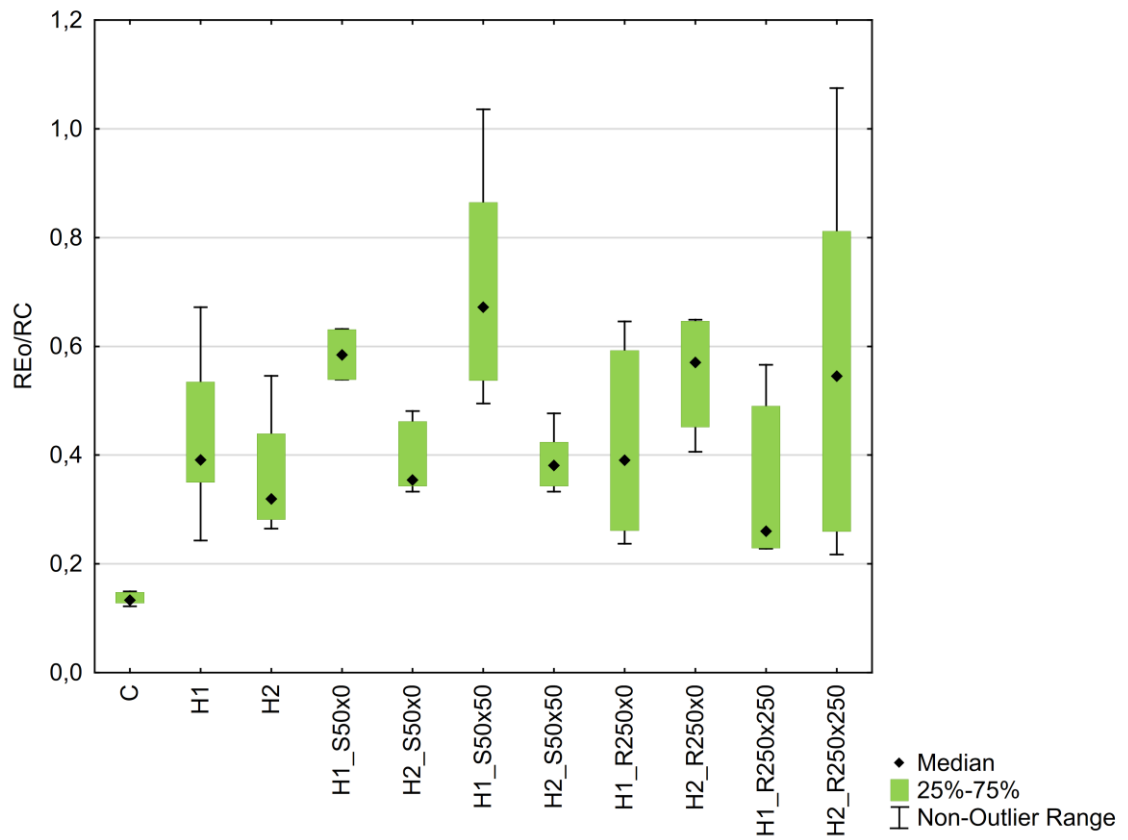

Supplement: s1 [file s1]
