# Supplementary material for: Physiological Response of Miscanthus x giganteus to Plant Growth Regulators in Nutritionally Poor Soil
Source: MDPI journal article supplement (doi:10.3390/plants9020194), 2020-02-05

**Figure S4:** Average month temperatures, precipitation and light period in Ústí nad Labem in 2017 (source: Czech hydrometeorological institute, <http://portal.chmi.cz/historicka-data/pocasi/mesicni-data#>)

a) Average month temperature

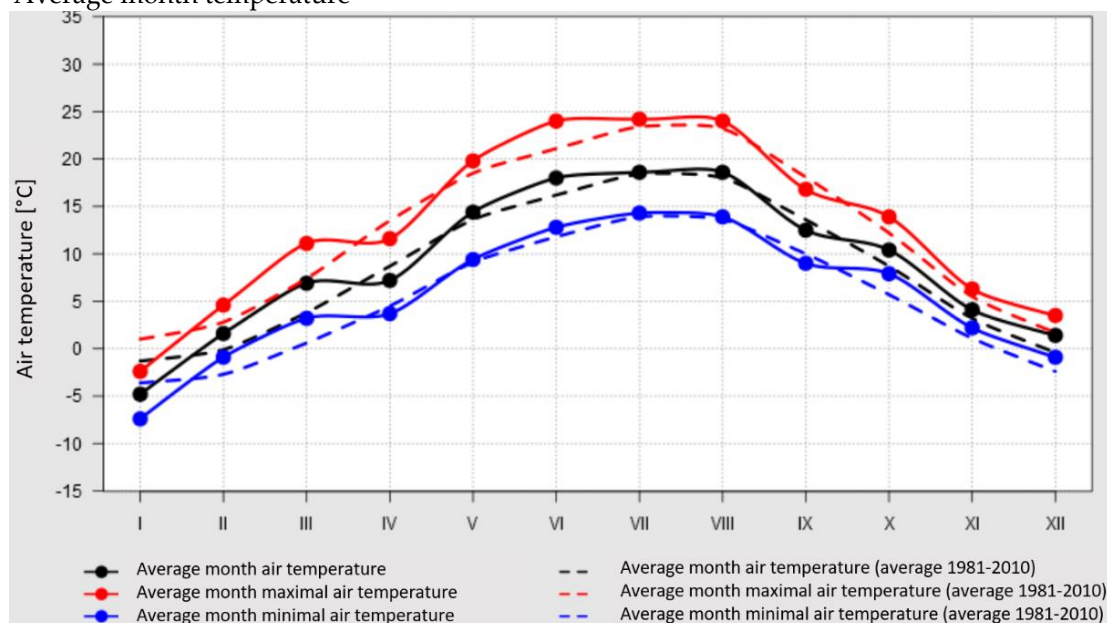

b) Average month precipitation

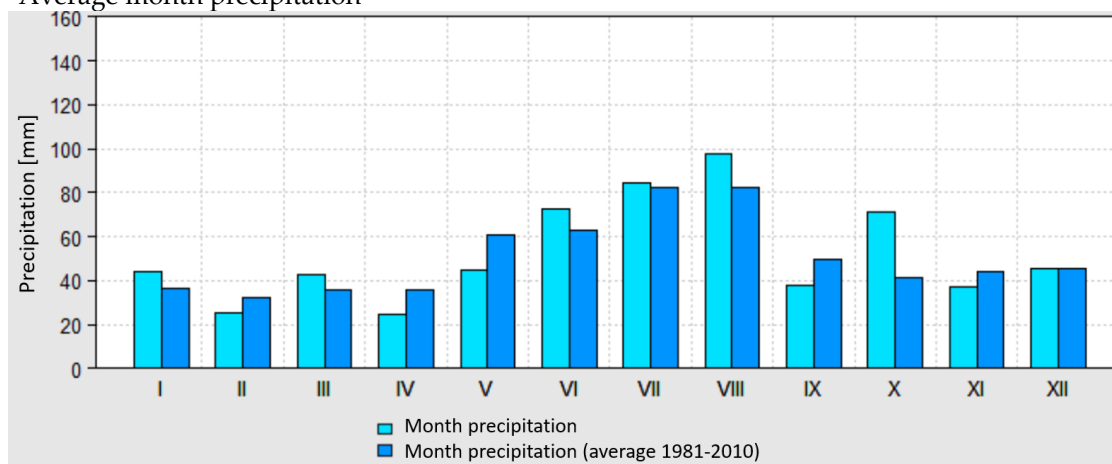

c) Average month light period

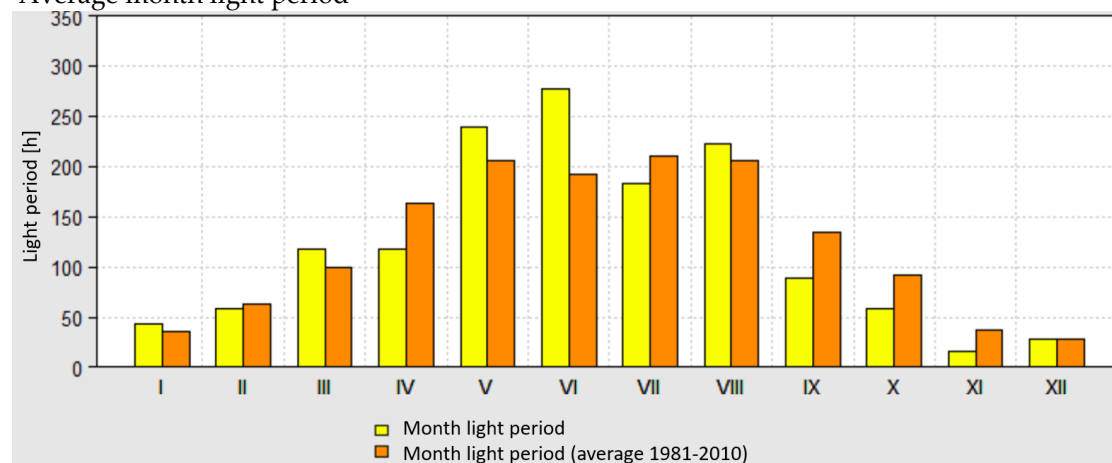

Supplement: s1 [file s1]
