# Supplementary figures and images for: Physiological Response of Miscanthus x giganteus to Plant Growth Regulators in Nutritionally Poor Soil
Source: MDPI journal article supplement (doi:10.3390/plants9020194), 2020-02-05

**Figure S3:** Photograph of the experiment

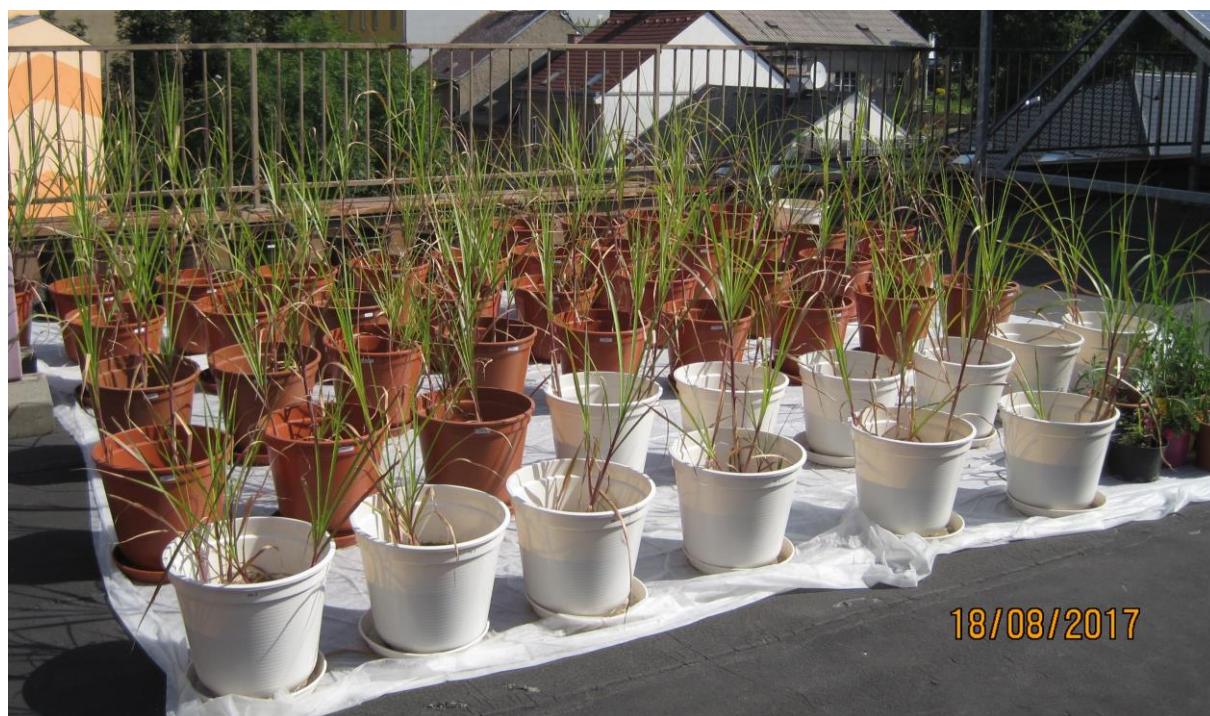

Supplement: s1 [file s1]
